# Supplementary material for: Association of genital human papillomavirus infection with HIV acquisition: a systematic review and meta-analysis
Source: HighWire-hosted journal article supplement (doi:10.1136/sextrans-2011-050346), 2013-06-12
Supplement: sextrans-2011-050346supp_appendix.pdf [file sextrans-2011-050346supp_appendix.pdf]

## APPENDIX

### ADDITIONAL TABLES

**Table S2a. High-risk HPV Genotype classification, by study**

| Genotype                 | 16 | 18 | 26 | 31 | 33 | 35 | 39 | 45 | 51 | 52 | 53 | 56 | 58 | 59 | 66 | 68 | 73 | 82v | IS39 |
|--------------------------|----|----|----|----|----|----|----|----|----|----|----|----|----|----|----|----|----|-----|------|
| Chin-Hong et al. 2009    | HR | HR |    | HR |    | HR | HR | HR |    | HR | HR |     |      |
| Smith et al. 2010        | HR | HR |    | HR | LR | HR | HR | HR | HR | HR | LR |     |      |
| Smith-McCune et al. 2010 | HR  |      |
| Veldhuijzen et al. 2010  | HR | HR |    | HR |    | HR | HR | HR |    | HR | HR | HR  | HR   |
| Auvert et al. 2011       | HR | HR |    | HR |    | HR | HR | HR |    | HR |    |     |      |
| Averbach et al. 2010     | HR | HR |    | HR |    | HR | HR | HR | HR | HR |    |     |      |

**Table S2b. Low-risk HPV Genotype classification, by study**

| Genotype                 | 6  | 11 | 26 | 30 | 32 | 34 | 40 | 42 | 43 | 44 | 53 | 54 | 55 | 57 | 61 | 62 | 64 | 66 | 67 | 68 | 69 | 70 | 71 | 72 | 73 | 81 | IS39/82 | 83 | 84 | CP6108 |    |
|--------------------------|----|----|----|----|----|----|----|----|----|----|----|----|----|----|----|----|----|----|----|----|----|----|----|----|----|----|---------|----|----|--------|----|
| Chin-Hong et al. 2009    | LR | LR |    |    |    |    |    |    |    |    | LR | LR | LR |    |    |    |    | LR |    |    |    |    |    |    |    |    |         |    | LR |        |    |
| Smith et al. 2010        | LR |    | LR | HR | LR      | LR | LR | LR     | LR |
| Smith-McCune et al. 2010 | LR | LR | HR |    | LR |    | LR |    |    |    | HR | LR | LR |    | LR |    |    | HR |    | HR | LR | LR |    |    | HR |    |         | LR | LR |        |    |
| Auvert et al. 2011       | LR | LR | LR |    |    |    | LR | LR |    |    | LR | LR | LR | LR |    |    |    | LR |    |    |    |    |    |    | LR |    | LR      | LR | LR |        |    |
| Averbach et al. 2010     | LR | LR | LR |    |    |    | LR | LR |    |    | LR | LR | LR |    | LR | LR | LR |    | LR |    | LR      | LR | LR | LR     |    |

Smith: cand85, 86, jc9710

**Table S3.** Variables included in multivariate models to compute adjusted estimates, by study.

|                                       | Age | Ethnic<br>group/<br>race | Education | Employment | Marital status<br>or cohabitating<br>status | HSV-2<br>status | STI<br>Status | Circumcision<br>status | Sexual<br>partners<br>characteristics | Condom<br>use | Sexual<br>behaviour | Other |
|---------------------------------------|-----|--------------------------|-----------|------------|---------------------------------------------|-----------------|---------------|------------------------|---------------------------------------|---------------|---------------------|-------|
| Men                                   |     |                          |           |            |                                             |                 |               |                        |                                       |               |                     |       |
| Chin-Hong et al. 2009 <sup>a</sup>    | x   | x                        |           |            |                                             | x               | x             |                        | x                                     |               | x                   | x     |
| Smith et al. 2010 <sup>b</sup>        | x   |                          |           | x          |                                             | x               |               | x                      |                                       |               |                     |       |
| Women                                 |     |                          |           |            |                                             |                 |               |                        |                                       |               |                     |       |
| Smith-McCune et al. 2010 <sup>c</sup> | x   |                          |           |            | x                                           | x               | x             | x <sup>d</sup>         |                                       | x             | x                   |       |
| Auvert et al. 2011 <sup>e</sup>       | x   |                          | x         |            |                                             |                 |               |                        |                                       | x             | x                   |       |
| Averbach et al. 2010 <sup>f</sup>     | g   |                          |           |            | x                                           | x               | x             |                        | x                                     | x             | x                   |       |

HSV-2: Herpes Simplex virus-2; STI: sexually transmitted infections (see below for study-specific details)

- a. HSV-2 status: self reported; STI status: *Neisseria Gonorrhoea*, *Chlamydia Trachomatis*, statuses are self-reported; Sexual partners characteristics: “HIV-negative and HIV-unknown-status partners”, “Primary partner HIV status”; Sexual behaviour: “Unprotected receptive and insertive anal sex with HIV-positive partners”, “Oral sex with HIV-positive or HIV-unknown status-partners”, “Drug use before sex”; Other: Drug use, Alcohol use, Depression.
- b. HSV-2 status: at inclusion
- c. STI status: Any positive test for *Neisseria Gonorrhoea*, *Chlamydia Trachomatis*, *Trichomonas vaginalis* or syphilis; Circumcision status: of regular partner; Sexual partners characteristics: “HIV-positive sexual partner”, “known or suspected concurrent sexual partnerships of main partner”, “Vaginal sex while partner under the influence of alcohol/drugs”, “Regular partner away from home for one month or more”; Sexual behaviour: “Any exchange of sex for money/food:/drugs/shelter”, “2 or more sexual partners within the last 3 months”, “Ever had vaginal sex while under the influence of alcohol/drugs”, “Injectable drug use”, “Anal sex”.
- d. Of their regular sexual partners
- e. STI status: Status for *Neisseria Gonorrhoea*, *Chlamydia Trachomatis*, *Trichomonas vaginalis*, *Candida albicans* and syphilis; Sexual behaviour: “Anal sex”, “Length of sex work”, “Number of clients per week”.
- f. STI status: Status for *Neisseria Gonorrhoea*, *Chlamydia Trachomatis*, *Trichomonas vaginalis*, candidiasis and bacterial vaginosis; Sexual behaviour: “Hormonal contraceptive use”; Sexual partners characteristics: “Primary partner with HIV infection”, “Primary partner with urethral discharge”, “Primary partner experiencing weight loss”, “Primary partner spending nights away for home” and/or “Primary partner having had sex with a female sex worker”.
- g. Cases and controls matched on age.

## **ADDITIONAL RESULTS**

### **Sensitivity analyses with alternative assessments**

The summary ORs computed with the alternative assessments [1] for both main and sub-group analyses yielded baseline estimates tending to be slightly lower than those of the main analysis. For baseline and current assessments, calculated ORs were respectively 1.94 (95%CI, 1.55–2.44) and 1.96 (95%CI, 1.55–2.48) for HPV, 1.78 (95%CI, 1.39–2.27) and 1.91 (95%CI, 1.49–2.46) for HR-HPV, and 1.47 (95%CI, 0.89–2.45) and 1.59 (95%CI, 0.97–2.61) for LR-HPV. There was no evidence of between-study heterogeneity for HPV (I-squared  $P=0.463$  and  $P=0.481$ , for both assessments, respectively) and HR-HPV (I-squared  $P=0.420$  and  $P=0.511$ , for both assessments, respectively). For LR-HPV, between-study heterogeneity was significant for both baseline and current assessments ( $P=0.037$  and  $P=0.022$ , respectively). The data are however too limited to make any inferences concerning the influence of the timing of HPV assessment in regards to HIV incidence.

## **EXTENDED DISCUSSION**

### **HPV acquisition and persistence and clearance of HPV infection**

The lack of evidence supporting an association of HIV acquisition and persistent HPV infection is surprising. Indeed, the lesions associated with persistent HPV infection are frequently infiltrated with T-lymphocytes and macrophages which could be target cells for HIV [2]. However, two of the reviewed studies [1, 3] found an association between non-persistent HPV and HIV acquisition, which could be explained by the host' tenuous immune response to HPV. HPV replication occurs within epithelial cells, and does not induce cytolysis, necrosis, or viraemia, which all tend to activate the immune response [4]. On the other hand, clearance of non-persisting HPV may induce an in-situ recruitment of potential target cells for HIV, and create a cytokinic and an upregulated interferon microenvironment favourable to HIV acquisition [5] . This mechanism could explain the conclusions of a recent study which found an significant association between HIV seroconversion and clearance of HR-HPV and LR-HPV infections [6].

## REFERENCES

1. Smith-McCune KK, Shiboski S, Chirenje MZ, et al. Type-specific cervico-vaginal human papillomavirus infection increases risk of HIV acquisition independent of other sexually transmitted infections. *PLoS One* 2010;**5**(4):e10094
2. Bleeker MC, Snijders PF, Voorhorst FJ, et al. Flat penile lesions: the infectious "invisible" link in the transmission of human papillomavirus. *Int J Cancer* 2006;**119**(11):2505-12
3. Averbach SH, Gravitt PE, Nowak RG, et al. The association between cervical human papillomavirus infection and HIV acquisition among women in Zimbabwe. *AIDS* 2010;**24**(7):1035-42
4. Veldhuijzen NJ, Snijders PJ, Reiss P, et al. Factors affecting transmission of mucosal human papillomavirus. *Lancet Infect Dis* 2010;**10**(12):862-74
5. Behbahani H, Walther-Jallow L, Klareskog E, et al. Proinflammatory and type 1 cytokine expression in cervical mucosa during HIV-1 and human papillomavirus infection. *J Acquir Immune Defic Syndr* 2007;**45**(1):9-19
6. Tobian AA, Grabowski MK, Kigozi G, et al. Human Papillomavirus Clearance in Men Is Associated with HIV Acquisition and Increased Foreskin Dendritic Cell Density in Rakai, Uganda. *J Infect Dis* 2013(EPUB)
